# Supplementary material for: From a bulk solid to thin films of a hybrid material derived from the [Ti10O12(cat)8(py)8] oxo-cluster and poly(4-vinylpyridine)
Source: Royal Society of Chemistry journal article supplement (doi:10.1039/c8nj05410j), 2019-01-01
Supplement: c8nj05410j1.pdf [file c8nj05410j1.pdf]

From a bulk solid to thin films of a hybrid material derived from the  $[\text{Ti}_{10}\text{O}_{12}(\text{cat})_8(\text{py})_8]$  oxo-cluster and poly(4-vinylpyridine).

Bianca Patrahau, Clément Chaumont, Laurent Barloy, Petra Hellwig, Marc Henry, Frédéric Melin, Pierre Mobian,\* Matthias Pauly

### Supporting information

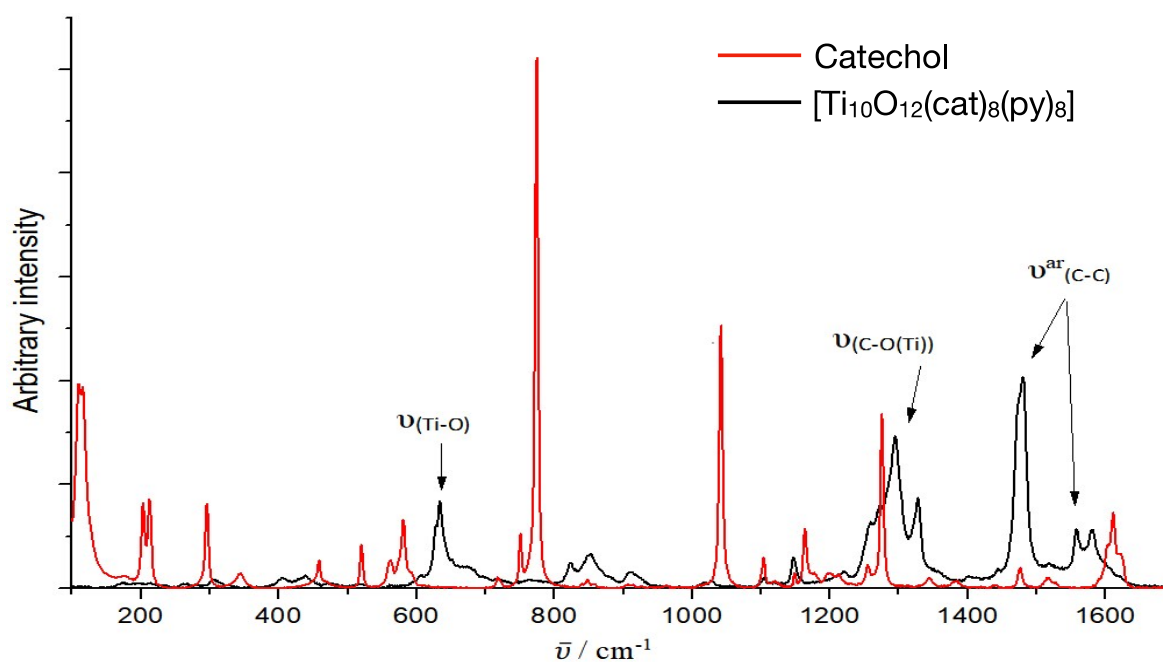

Figure 1: Superimposed Raman spectra of the oxo-cluster (red) and catechol ligand (black).



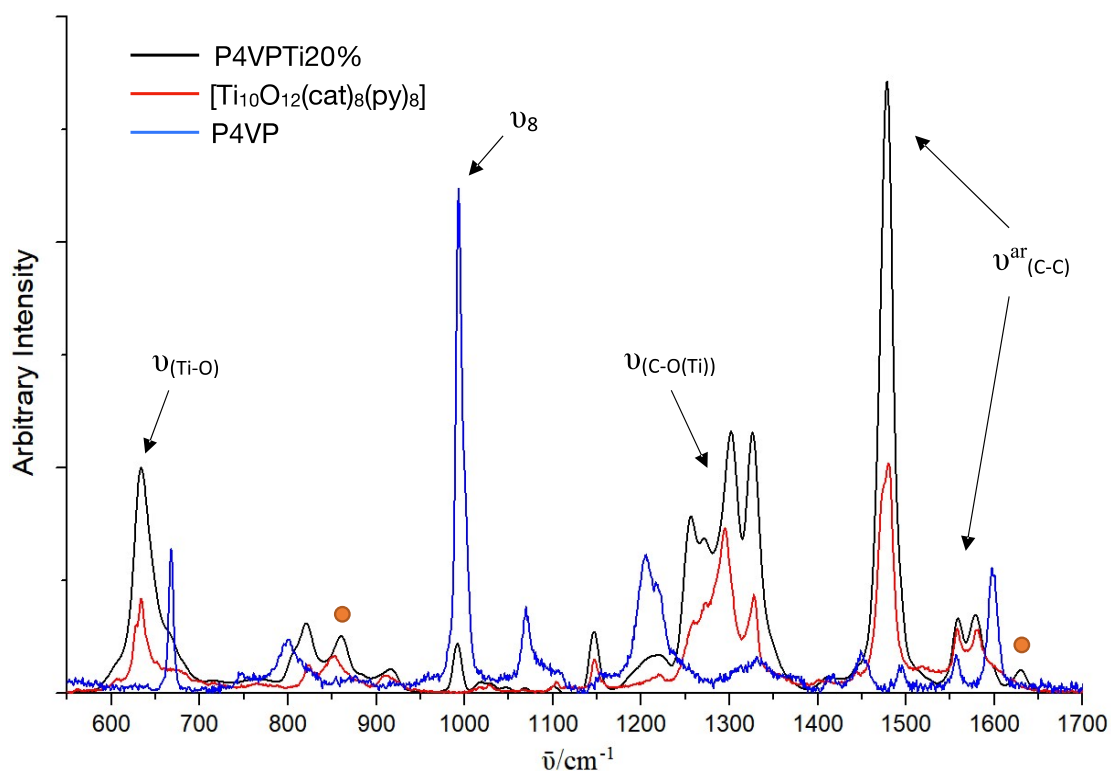

Figure 2: Superimposed Raman spectra of P4VP (blue), the oxo-cluster (red) and the hybrid material (black). The new emerging vibrations bands of the hybrid material are indicated with the orange spots.

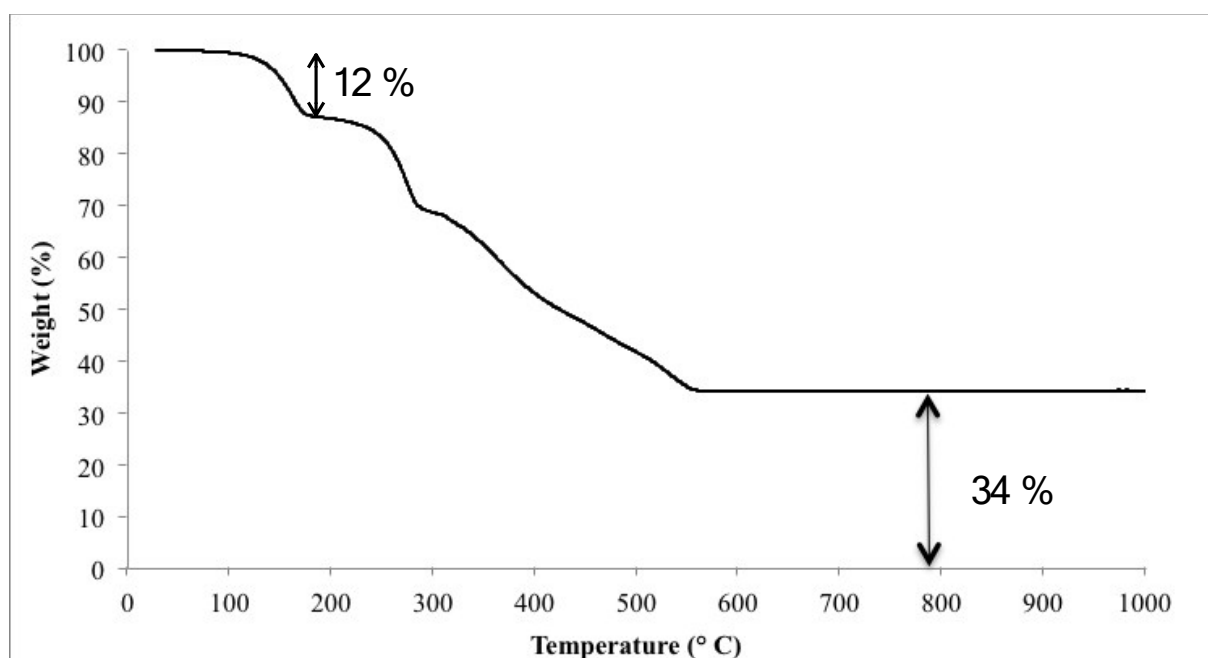

Figure 3: Thermogravimetric analysis of  $[\text{Ti}_{10}\text{O}_{12}(\text{cat})_8(\text{py})_8]$ : The analysis was performed under air at a scan rate of  $5\text{ }^{\circ}\text{C}\cdot\text{min}^{-1}$ . The 34 % weight obtained at  $600\text{ }^{\circ}\text{C}$  corresponds to the residual  $\text{TiO}_2$  formed during the thermolysis process. The weight losses obtained are compatible with partially desolvated crystals displaying the  $[\text{Ti}_{10}\text{O}_{12}(\text{cat})_8(\text{py})_8]\cdot(\text{py})_4$



formula. In this case the weight loss corresponding to the free pyridine molecules is evaluated as 12.7 % and the theoretical percentage of residual  $\text{TiO}_2$  is 32.2 %.
